## Failure of Prophylaxis with Fresh Frozen Plasma after Cardiopulmonary Bypass

RAYMOND C. ROY, PH.D., M.D.,\* MICHAEL A. STAFFORD, F.F.A.R.C.S.,†  
ALLEN S. HUDSPETH, M.D.,‡ J. WAYNE MEREDITH, M.D.§

Despite the recommendations of the 1984 Consensus Conference,<sup>1</sup> many clinicians still administer fresh frozen plasma (FFP) prophylactically after cardiopulmonary bypass to offset the dilution of clotting factors.<sup>2-6</sup> The risks of disease transmission<sup>6,7</sup> and noncardiogenic pulmonary edema (NCPE)<sup>7-9</sup> from FFP mandate clear documentation of its benefit to justify its routine prophylactic use. We had the opportunity to study its efficacy when a cardiac anesthesia and surgical team, previously using liberal amounts of FFP in their fluid administration protocol, eliminated it completely from their regimen after a patient developed NCPE during an infusion of FFP. We present a sequential retrospective study of blood product administration, coagulation profiles, and blood loss in 100 patients presenting for coronary artery bypass surgery who received either FFP or albumin after cardiopulmonary bypass.

## MATERIALS AND METHODS

We reviewed the anesthetic and intensive care unit (ICU) records of 100 consecutive patients who had undergone elective aortocoronary artery bypass grafting by the same surgeon between August, 1984, and March, 1985. Fifty-two patients received FFP post-bypass (group F), and 48, treated after the episode of NCPE, received albumin (group A). Preoperatively, all patients had normal prothrombin (PT), activated par-

tial thromboplastin (PTT), and bleeding times, normal platelet counts, and hemoglobins greater than 12 g/dl. None were taking aspirin in the 2 weeks prior to surgery.

All patients were premedicated with im morphine and oral lorazepam, and were anesthetized with iv fentanyl or sufentanil supplemented with diazepam or low concentrations of halothane, enflurane, or isoflurane. Six anesthesiologists were involved. All patients underwent nonpulsatile cardiopulmonary bypass with Shiley S100A bubble oxygenators, crystalloid prime, moderate hypothermia, and cold potassium cardioplegia. Systemic heparinization, achieved with 400 u/kg, was monitored using the activated clotting time (ACT) (HemoChron, International Technidyne, Inc., Edison, NJ) and an automated heparin-protamine titration (Hepcon System A-10, HemoTec, Inc., Englewood, CO).<sup>10</sup> During bypass, the ACTs always exceeded 480 s and the circulating heparin always exceeded 250 u/kg. The protamine dose was also determined by heparin-protamine titration. The protamine was administered intra-aortically as previously described.<sup>11</sup> The return of serial ACTs to normal and the absence of a heparin effect in the protamine titration confirmed heparin neutralization.

The surgical team salvaged blood from the operative field only during anticoagulation. No cell-saving device was utilized, nor was residual blood in the oxygenator transfused after removal of the aortic cannula. No patient had internal mammary artery anastomoses with thoracotomy drains. Those patients with hematocrits less than 32% requiring volume were transfused with bank blood. Blood from mediastinal drainage was not processed and reinfused.

Group F patients received two units of FFP after confirmation of heparin neutralization with protamine. Additional units were given for volume replacement as indicated by the systemic and pulmonary capillary wedge pressures. Patients in group A, given no FFP, received 5% albumin for volume replacement. PT and PTT determinations proceeded immediately upon arrival of the patient in the ICU. Blood loss was defined as the 24-h mediastinal drainage volume.

The two groups were compared using Student's *t* test for the parametric data, the Mann-Whitney U-test for the non-parametric data, and the Chi-square test for the sex ratios and the distribution of anesthesiologists.

\* Associate Professor and Vice-chairman, Department of Anesthesia, Bowman Gray School of Medicine.

† Senior Lecturer, Department of Anaesthesia, University of Newcastle upon Tyne.

‡ Professor, Department of Surgery, Bowman Gray School of Medicine.

§ Assistant Professor, Department of Surgery, Bowman Gray School of Medicine.

Received from the Departments of Anesthesia and Surgery, North Carolina Baptist Hospital and Bowman Gray School of Medicine of Wake Forest University, Winston-Salem, North Carolina; and the Department of Anaesthesia, Royal Victoria Infirmary, University of Newcastle upon Tyne, Newcastle upon Tyne, NE1 4LP, UK. Accepted for publication February 23, 1988. Presented at the Annual Meeting of the International Anesthesia Research Society, March 7, 1988, San Diego, California.

Address reprint requests to Dr. Roy: Department of Anesthesia, The Bowman Gray School of Medicine, 300 South Hawthorne Road, Winston-Salem, North Carolina 27103.

Key words: Blood: coagulation; fresh frozen plasma. Surgery: cardiac.

## RESULTS

Between the two groups, no differences existed in age, number of grafts, bypass time, heparin and protamine doses, male:female ratio, or distribution of anesthesiologists. The PT was shorter, but the PTT was longer, in group F ( $P < 0.05$ ). One patient in group F and two patients in group A required re-exploration for bleeding, and were not included in the data presented in tables 1 and 2. In these three patients, bleeding was confined to specific sites with no observation of generalized bleeding. The 24-h blood losses were less than 1100 ml in all remaining patients, except for two in group F (table 1). These two patients account for the larger mean blood loss in group F, although the difference in blood loss between the two groups was not statistically significant. Also, the administration of platelets to these two patients allowed the difference between groups in the number of units of platelets transfused to achieve significance.

Between the two groups, the number of units of whole blood and packed red cells transfused did not differ (table 2). However, the patients in group F received more blood components due to the highly significant ( $P < 0.001$ ) difference in the number of FFP units given to these patients for bleeding prophylaxis and intravascular volume replacement.

## DISCUSSION

Our results suggest that the prophylactic administration of an average of six units of FFP does not reduce blood loss or limit the number of patients requiring re-exploration for bleeding after cardiopulmonary bypass. Kaplan *et al.* previously demonstrated that the prophylactic administration of two units of FFP and eight units of platelets did not improve 24-h blood loss.<sup>12</sup> In both studies, higher hematocrits were sought than is now more commonly the case.<sup>13,14</sup> The results of these studies would be more relevant to current practice if more hemodilution and blood conservation had been practiced. Each unit of red cells or platelets contains 50–75 ml of plasma; each unit of whole blood, 250–300 ml of plasma.<sup>15</sup> Factors V and VIII are more stable in this plasma than previously thought.<sup>16,17</sup> Enough plasma may have been present in the bank blood products administered to the albumin and control groups in the above studies to restore clotting factors to levels above the threshold required for a normal hemostatic response,<sup>16</sup> if, indeed, they ever did fall below that threshold.<sup>4,18–20</sup> Thus, the contribution that FFP may have made would have to be determined by direct factor assays.

The prophylactic administration of FFP does not appear to be necessary for at least three reasons. First,

TABLE 1. Units of Various Blood Components Transfused and Number of Blood Component Donors

|                         | Group F<br>(FFP)        | Group A<br>(Albumin)           |
|-------------------------|-------------------------|--------------------------------|
| Blood components, units |                         |                                |
| Whole blood             | $1.5 \pm 0.2$<br>(0–4)  | $1.8 \pm 0.2$<br>(0–4)         |
| Total blood             | $5.5 \pm 0.3$<br>(2–10) | $5.3 \pm 0.2$<br>(3–10)        |
| Platelets               | $2.7 \pm 0.8$<br>(0–24) | $0.9 \pm 0.4^*$<br>(0–12)      |
| Fresh frozen plasma     | $5.8 \pm 0.5$<br>(2–16) | $0.2 \pm 0.1^\dagger$<br>(0–2) |
| Donors per patients     | $14.0 \pm 0.5$          | $6.4 \pm 0.5^\dagger$          |

Total blood = whole blood + packed red cells; platelets = random donors; all values expressed as mean  $\pm$  SEM (range).

\*  $P < 0.05$ .

†  $P < 0.001$ .

although dilution of clotting factors does occur, the post-bypass plasma levels of all clotting factors remain more than adequate for normal hemostasis, and rapidly recover to pre-bypass levels.<sup>4,18–20</sup> Second, body stores and *de novo* synthesis of coagulation proteins by the liver create a reserve which, for example, is sufficient to maintain clotting activity at an effective level, even after extensive plasmapheresis.<sup>21</sup> Although effective hepatic blood flow suffers a reduction during non-pulsatile cardiopulmonary bypass, it returns to normal within 30 min after resumption of pulsatile flow.<sup>22,23</sup> Even in liver transplant patients, the transplanted liver makes clotting factors within a short time after its implantation.<sup>24</sup> Finally, and most importantly, platelet dysfunction, not coagulation protein deficiency, appears to be the most likely cause of bleeding problems after bypass.<sup>18,25–27</sup>

The longer PTT in the FFP group may indicate a small residual heparin effect. FFP prolongs the ACT in heparinized patients with normal antithrombin III levels.<sup>28</sup> Shanberge *et al.* have demonstrated *in vitro* that

TABLE 2. Blood Loss and Coagulation Studies

|                   | Group F<br>(FFP)              | Group A<br>(Albumin)            |
|-------------------|-------------------------------|---------------------------------|
| Re-explored       | 1                             | 2                               |
| Significant bleed | 2                             | 0                               |
| Blood loss (ml)   | $630 \pm 44$<br>(245–1700)    | $550 \pm 24$<br>(250–950)       |
| PT (s)            | $14.6 \pm 0.1$<br>(12.6–17.9) | $15.2 \pm 0.1^*$<br>(13.8–18.1) |
| PTT (s)           | $31.6 \pm 0.8$<br>(25.2–59.1) | $29.7 \pm 0.5^*$<br>(22.7–39.8) |

PT = prothrombin time (normal 11.0–13.4 s), PTT = partial thromboplastin time (normal < 31 s), both determined on arrival in ICU from OR; significant bleed = total ml blood loss > 1100 ml, but < 300 ml/h. Values expressed as mean  $\pm$  SEM (range).

\*  $P < 0.05$ .

FFP reverses protamine neutralization of heparin. The antithrombin III in the FFP shifts the heparin neutralization reaction to the left by the law of mass action:

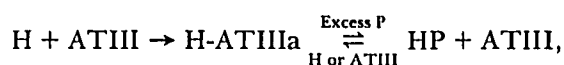

where H = heparin; ATIII = antithrombin III; ATIIIa = active antithrombin III; and HP = heparin-protamine complex.<sup>29</sup> More protamine would then be required.

Since FFP does not appear to contribute measurably to post-bypass hemostasis, it becomes primarily a colloid volume expander, performing a function that can be better assumed by more innocuous therapeutic agents. Plasma substitutes are associated with no disease transmission and fewer untoward reactions.<sup>30-32</sup> Although 5% albumin, used in place of FFP in this study, technically represents a blood component, the process of cold ethanol fractionation and subsequent heat treatment effectively sterilize it.<sup>31,33</sup> Also, it contains no immunoglobulins to trigger NCPE. The incidence of life-threatening reactions relating to albumin administration is only 0.003%, whereas the incidence climbs to 0.1% for FFP.<sup>30,32</sup>

The sequential nature of this study (*i.e.*, one group examined, then another) does represent a major shortcoming. However, limiting the study to a single surgical team performing the same procedure over a limited time span offsets the disadvantages of some prospective studies, which usually involve several surgeons using different fluid regimens and heparin and protamine protocols. Because the decision to perform the chart review came as a result of the adverse publicity FFP was receiving<sup>34</sup> and after the surgeries had been performed, the study did not influence surgical technique.

A separate issue is whether the administration of FFP is indicated in those patients who still seem to be bleeding after heparin neutralization. In a recent study designed to demonstrate cost-effectiveness of blood conservation, FFP was administered to 20% of 284 patients without documentation of a fall in factor levels below critical concentrations.<sup>14</sup> This practice is commonplace.<sup>2,3</sup> There are no studies that document the efficacy of FFP in this setting, nor are they likely to be any. FFP infused at a rate of at least 800 ml/70 kg/h improved factor levels only marginally and temporarily in the presence of hemorrhagic shock in humans.<sup>16</sup> Large doses of FFP did not restore coagulation activity in a well-designed dog study of hemorrhagic shock by Martin *et al.*<sup>35</sup>

In summary, a case of NCPE, temporally associated with the prophylactic administration of FFP to a patient after cardiopulmonary bypass, prompted re-evaluation of FFPs contribution toward the reduction of bleeding problems. No difference existed in blood loss or in units

of blood transfused when comparing patients receiving FFP prophylactically after cardiopulmonary bypass with those receiving 5% albumin. Substitution of the albumin for FFP permitted a reduction in the number of stored blood products and reduces the risk of disease transmission or untoward reaction. Blood conservation methods, which decrease the homologous blood requirement, would further reduce these risks.

The authors wish to thank Mrs. J. Kiger, R.N., for assistance in reviewing the medical records, Professor C. J. Hull, Dr. John Tetzlaff, and Mrs. Susan Margitic for discussions and constructive criticism, and Mrs. E. Simpson and Mrs. R. Moore for invaluable secretarial help.

## REFERENCES

1. Consensus Conference. Fresh frozen plasma: Indications and risks. *JAMA* 253:551-553, 1984
2. Snyder AJ, Gottschall JL, Menitove JE: Why is fresh frozen plasma transfused? *Transfusion* 26:107-112, 1986
3. Shanberge JN: Reduction of fresh frozen plasma use through a daily survey and education program. *Transfusion* 27:226-227, 1987
4. Bagge L, Lilienberg G, Nystrom S-V, Tyden H: Coagulation, fibrinolysis, and bleeding after open heart surgery. *Scand J Thorac Cardiovasc Surg* 20:151-160, 1986
5. Mantia AM, Lolley DM, Stullken EM, Pagan H, Berkebile PE, Hanrahan JB, Wee GO: Coronary artery bypass grafting within 24 hrs after intracoronary streptokinase thrombolysis [see control group]. *J Cardiothorac Anesth* 1:392-400, 1987
6. Amyard JP, Janot C, Gayet S, Guillemin C, Canton P, Gaucher P, Streiff F: Post-transfusion non-A, non-B hepatitis after cardiac surgery. *Vox Sang* 51:236-238, 1986
7. Gravlee GP, Hopkins MB: The appropriate use of blood bank plasma products in surgical patients, Effective Hemostasis in Cardiac Surgery. Edited by Ellison N, Jobes DR. Orlando, Grune & Stratton, 1988, in press
8. Hashim SW, Kay HR, Hammond GL, Kopf GS, Geha AS: Non-cardiogenic pulmonary edema after cardiopulmonary bypass: An anaphylactic reaction to fresh frozen plasma. *Am J Surg* 147:560-564, 1984
9. Nordhagen R, Conradi M, Dromtorp SM: Pulmonary reaction associated with transfusion of plasma containing anti-5b. *Vox Sang* 51:102-107, 1986
10. Gravlee GP, Brauer SD, Roy RC, Howard G, Kiger J, Scott C, Royster RL, Pauca AL: Predicting the pharmacodynamics of heparin: A clinical evaluation of the Hepcon System 4. *J Cardiothorac Anesth* 1:379-387, 1987
11. Pauca AL, Graham JE, Hudspeth AS: Hemodynamic effects of intra-aortic administration of protamine. *Ann Thorac Surg* 35:637-642, 1983
12. Kaplan JA, Cannarella C, Jones EL, Kutner MH, Hatcher CR, Dunbar RW: Autologous blood transfusion during cardiac surgery. *J Thorac Cardiovasc Surg* 74:4-10, 1977
13. Cosgrove DM, Loop FD, Lytle BW, Gill CC, Golding LR, Taylor PC, Forsythe SB: Determinants of blood utilization during myocardial revascularization. *Ann Thorac Surg* 40:380-384, 1985
14. Breyer RM, Engelman RM, Rousou JA, Lemeshow S: Blood conservation for myocardial revascularization. *J Thorac Cardiovasc Surg* 93:512-522, 1987
15. Stehling LC: Recent advances in transfusion therapy. *Adv Anesthesiol* 4:213-254, 1987

16. Braunstein AH, Oberman HA: Transfusion of plasma components. *Transfusion* 24:281-286, 1984
17. Nilsson L, Hedner U, Nilsson IM, Robertson B: Shelf-life of bank blood and stored plasma with special reference to coagulation factors. *Transfusion* 23:377-381, 1983
18. Harker LA, Malpass TW, Branson HE, Hessel EA II, Slichter SJ: Mechanism of abnormal bleeding in patients undergoing cardiopulmonary bypass: Acquired transient platelet dysfunction associated with selective  $\alpha$ -granule release. *Blood* 56:824-834, 1980
19. Milam JD, Austin SF, Martin RF, Keats AS, Cooley DA: Alteration of coagulation and selected clinical chemistry parameters in patients undergoing open heart surgery without transfusions. *Am J Clin Pathol* 76:155-162, 1981
20. Mammen EF, Koets MH, Washington BC, Wolk LW, Brown JM, Burdick M, Selik NR, Wilson RF: Hemostasis changes during cardiopulmonary bypass surgery. *Semin Thromb Hemost* 11:281-292, 1985
21. Brozovic B, Fleck A, Colley SM, Hollan SR, Krebs H-J, Oberman HO, Schoir JB, van Aken WG, Reesink HW: How much plasma relative to his body weight can a donor give over a certain period of time without a continuous deviation of his plasma protein metabolism in the direction of plasma protein deficiency? *Vox Sang* 47:435-448, 1984
22. Howie MB, Mortimer W, Rathburn S, Myers D, Dumond DA: Does pulsatile flow maintain liver blood flow during cardiopulmonary bypass (abstract)? *ANESTHESIOLOGY* 65:A52, 1986
23. Mathie RT, Desai JB, Taylor KM: The effect of normothermic cardiopulmonary bypass on hepatic blood flow in the dog. *Perfusion* 1: 245-253, 1986
24. Kang YK, Martin DJ, Marquez J, Lewis JH, Bontempo FA, Shaw BW, Starzl TE, Winter PM: Intraoperative changes in blood coagulation and thromboelastographic monitoring in liver transplantation. *Anesth Analg* 64:888-896, 1985
25. Harker LA: Bleeding after cardiopulmonary bypass (editorial). *N Engl J Med* 314:1446-1448, 1986
26. Martin JF, Daniel TD, Trowbridge EA: Acute and chronic changes in platelet volume and count after cardiopulmonary bypass induced thrombocytopenia in man. *Thromb Haemost* 57:55-58, 1987
27. Dechanne M, French M, Pages J, French P, Boutzerche H, Bujow PA, McGregor JL: Significant reduction in the binding of a monoclonal antibody (LYP F8) directed against the IIb/IIIa glycoprotein complex in platelets of patients having undergone extracorporeal circulation. *Thromb Haemost* 57:106-109, 1987
28. Barnette RE, Shirpak RC, Shepard WR, Rao AK: In-vitro effect of fresh frozen plasma on the ACT in patients undergoing cardiopulmonary bypass (abstract). *ANESTHESIOLOGY* 63:A40, 1985
29. Shanberge JN, Murato M, Quattrocchio-Longe T, Van Neste L: Heparin-protamine complexes in the production of heparin rebound and other complications of extracorporeal bypass procedures. *Am J Clin Pathol* 87:210-217, 1987
30. Doenicke A, Grote B, Lorenz W: Blood and blood substitutes. *Br J Anaesth* 49:681-688, 1977
31. Gerety RJ, Aronson DL: Plasma derivatives and viral hepatitis. *Transfusion* 22:347-351, 1982
32. Ring J, Messmer K: Incidence and severity of anaphylactoid reactions to colloid volume substitutes. *Lancet* i:466-469, 1977
33. Spire B, Dormont D, Barre-Sinoussi F, Montagnier L, Chermann JC: Inactivation of lymphadenopathy-associated virus by heat, gamma rays, and ultraviolet light. *Lancet* i:188-189, 1985
34. Bove JR: Fresh frozen plasma: Too few indications—Too much use (editorial). *Anesth Analg* 64:849-850, 1985
35. Martin DJ, Lucas CE, Ledgerwood AM, Hoschner J, McGonigal MD, Grabow D: Fresh frozen plasma supplement to massive red blood cell transfusion. *Ann Surg* 202:505-511, 1985

Anesthesiology  
69:257-260, 1988

## Rise in Pulmonary Arterial Pressure following Release of Aortic Crossclamp in Abdominal Aortic Aneurysmectomy

MOTOSHI KAINUMA, M.D.,\* KIMITOSHI NISHIWAKI, M.D.,† YASUHIRO SHIMADA, M.D.‡

Many reports<sup>1-6</sup> have described the hemodynamic effects of aortic cross-clamping (XC) and declamping (XD) during surgery for abdominal aortic aneurysms

(AAA). Although systemic arterial hypotension following XD is well established, reports of changes in pulmonary arterial pressure are not well documented. During routine monitoring of patients during AAA surgery, we noted a transient rise in pulmonary arterial pressure (PAP) following XD. We, therefore, prospectively evaluated changes in pulmonary arterial pressure after XD in patients undergoing AAA surgery.

### MATERIALS AND METHODS

Eighteen consecutive patients (NYHA Class I or II) undergoing elective surgical treatment of infrarenal AAA were selected for study after institutional approval and informed consent were obtained. Five patients were excluded from the results (*vide infra*). The

\* Assistant Professor of Anesthesiology.

† Staff of Anesthesiology.

‡ Professor and Chairman of Anesthesiology.

Received from the Department of Anesthesiology, Nagoya University School of Medicine, Tsurumai-cho, Showa-ku, Nagoya 466, Japan. Accepted for publication March 1, 1988.

Address reprint requests to Dr. Kainuma: Assistant Professor, Department of Anesthesiology, Nagoya University School of Medicine, 65 Tsurumai-cho, Showa-ku, Nagoya 466, Japan.

Key words: Lung; pulmonary hypertension. Monitoring: end-expiratory carbon dioxide; mixed venous oxygen saturation; pulmonary arterial pressure. Surgery: aortic aneurysmectomy; aortic cross-clamping; aortic declamping.
